# Supplementary material for: The ameliorative effect of a Lactobacillus strain with good adhesion ability against dextran sulfate sodium-induced murine colitis
Source: Royal Society of Chemistry journal article supplement (doi:10.1039/c8fo01453a), 2018-12-03
Supplement: c8fo01453a1.pdf [file c8fo01453a1.pdf]

### Supplemental Materials

Table S1 Primer sequences for quantitative real-time PCR

| Gene           | Forward primer(5'-3')    | Reverse primer(5'-3')     |
|----------------|--------------------------|---------------------------|
| TNF- $\alpha$  | AGGGTCTGGGCCATAGAACT     | CCACCACGCTCTTCTGTCTAC     |
| IL-1 $\beta$   | CTGAACTCAACTGTGAAATGC    | TGATGTGCTGCTGCGAGA        |
| IL-6           | GAGGATACTCACTCCCAACAGACC | AAGTGCATCATCGTTGTTTCATACA |
| MUC2           | ATGCCACCTCCTCAAAGAC      | GTAGTTTCCGTTGGAACAGTGAA   |
| ZO-1           | CTTCTCTTGCTGGCCCTAAAC    | TGGCTTCACTTGAGGTTTCTG     |
| Claudin 3      | AACTGCGTACAAGACGAGACG    | ATCCCTGATGATGGTGTGG       |
| E-cadherin 1   | CAGGTCTCCTCATGGCTTTGC    | CTTCCGAAAAGAAGGCTGTCC     |
| $\beta$ -actin | GGCTGTATTCCCCTCCATCG     | CCAGTTGGTAACAATGCCATGT    |
